# Supplementary material for: Dissection of Symbiosis and Organ Development by Integrated Transcriptome Analysis of Lotus japonicus Mutant and Wild-Type Plants
Source: PLoS One. 2009 Aug 7;4(8):e6556. doi: 10.1371/journal.pone.0006556 (PMC2717213; doi:10.1371/journal.pone.0006556)
Supplement: Table S3 — L. japonicus constitutively expressed genes (0.08 MB XLS) [file pone.0006556.s008.xls]

## Sheet: Sheet1
A		Constitutively Expressed Genes Across All Conditions (11 Probe Sets/11 ORFs)
				gcRMA expression
		ORF	Probe Set	nfr1_Rz1d_rootwindow	nfr5_Rz1d_rootwindow	nin_Rz1d_rootwindow	nup133_Rz1d_rootwindow	WT_Rz1d_rootwindow	WT_NF1d_rootwindow	nfr1_uninoculated_rootwindow	nfr5_uninoculated_rootwindow	nin_uninoculated_rootwindow	nup133_uninoculated_rootwindow	WT_uninoculated_rootwindow	WT_uninoculated_root_tip	WT_Rz1d_root	WT_Rz1d+nodC_root	WT_Rz3d_root	WT_Rz3d_shoot	sym16_Rz3d_root	sym16_Rz3d_shoot	sym16_uninoculated_root	sym16_uninoculated_shoot	WT_uninoculated_root	WT_uninoculated_shoot	WT_nitrate3weeks_root	WT_nitrate3weeks_shoot	sym6_uninoculated	sym11_uninoculated	sym13_uninoculated	sym6_Rz21d	sym11_Rz21d_nodule	sym13_Rz21d_nodule	WT_Rz21d_nodule	WT_Rz21d_root+nodule	WT_Rz14d_nodule	WT_Rz7d_root+nodule	WT_nitrate6weeks_root	WT_nitrate6weeks_leaves	WT_nitrate6weeks_stems	WT_nitrate13weeks_flowers	range
		gi45348456	gi45348456_x_at	12.008	12.0105	11.9038	11.9955	11.791	11.9187	12.1888	12.0172	11.8841	12.0645	11.8173	11.8287	12.0418	12.0293	11.8188	11.9674	12.0789	11.9367	12.0301	12.1323	11.9154	11.9715	11.9465	11.9109	12.205	11.9725	11.9629	11.7599	11.8466	11.8733	11.864	12.0511	11.8373	12.007	12.0991	11.8723	11.8741	11.8726	0.445074
		Ljwgs_052271.2	Ljwgs_052271.2_s_at	11.2255	11.1444	11.1807	11.2114	11.2876	11.2246	10.9429	11.0124	11.1858	11.3794	11.3709	11.1596	11.1894	11.3557	11.2219	10.9254	11.0784	10.9907	11.3448	11.2934	11.1056	11.2236	11.1807	11.0774	11.0564	11.2091	11.2234	11.1114	10.9194	10.9044	10.9325	11.0931	10.9167	11.1834	11.3661	11.0483	11.4017	11.0119	0.497317
		chr2.TM0660.1	chr2.TM0660.1_at	9.78813	9.70889	9.61546	9.70426	9.6948	9.70754	9.82309	9.9706	9.85039	9.61063	9.89454	9.69435	9.83627	9.84616	9.8925	9.63293	9.95196	9.87392	10.009	9.74708	9.82348	9.77276	9.81521	9.56512	9.64975	9.80319	9.76712	9.81636	9.89051	9.7918	9.71752	9.76062	9.89933	9.61177	9.8564	9.74923	9.86027	9.52891	0.480039
		Ljwgs_022993.1	Ljwgs_022993.1_at	8.23832	8.35829	8.24489	8.34609	8.21426	8.10852	8.1803	8.27156	8.24981	8.33249	8.22103	8.59849	8.31939	8.32602	8.41741	8.25872	8.37729	8.27279	8.33711	8.31719	8.29929	8.28053	8.38428	8.35598	8.41516	8.39667	8.45668	8.44228	8.32658	8.30503	8.31766	8.22792	8.43794	8.38488	8.48546	8.57061	8.38511	8.31376	0.489974
		gi45625132	gi45625132_at	8.1725	8.09646	8.15527	8.19189	8.16977	8.18515	8.53331	8.19353	8.08286	8.19623	8.13147	8.17562	8.2015	8.23992	8.17909	8.16485	8.2859	8.18644	8.24939	8.35841	8.15977	8.19185	8.21172	8.15503	8.23395	8.19296	8.32206	8.18056	8.26804	8.34131	8.21838	8.23278	8.18073	8.18612	8.33398	8.1788	8.19883	8.15579	0.45045
		Ljwgs_126977.1	Ljwgs_126977.1_at	7.52423	7.53692	7.49892	7.42454	7.51424	7.50182	7.52199	7.3372	7.43931	7.5418	7.51918	7.53827	7.53315	7.52976	7.57163	7.51414	7.72949	7.50703	7.54736	7.55215	7.5296	7.51762	7.55373	7.52552	7.71364	7.75028	7.52776	7.78557	7.51805	7.52243	7.6368	7.57202	7.5219	7.7046	7.53118	7.52211	7.57993	7.46178	0.448367
		Ljwgs_056473.2	Ljwgs_056473.2_at	6.86616	6.89324	6.93946	6.88434	6.79687	6.78551	6.90084	7.0914	6.83486	6.91162	6.8963	6.84805	6.90152	6.91762	6.97107	6.78855	6.90907	6.9449	6.89307	6.93725	6.8667	6.95606	6.98113	6.82786	6.84141	6.92029	6.80305	7.06799	6.79175	6.93779	6.77713	6.84911	6.76617	6.75801	6.87456	6.9241	6.79073	6.80832	0.33339
		chr1.CM0029.4	chr1.CM0029.4_at	6.41347	6.483	6.35833	6.52385	6.3558	6.41227	6.42107	6.44477	6.3774	6.458	6.42826	6.43288	6.45777	6.43778	6.41365	6.51466	6.42424	6.45728	6.43383	6.60324	6.40596	6.50659	6.43209	6.41728	6.55088	6.46033	6.38865	6.40503	6.39898	6.44702	6.59358	6.43359	6.43396	6.44777	6.4119	6.42179	6.48886	6.45762	0.247442
		Ljwgs_018207.1	Ljwgs_018207.1_at	6.51593	6.50479	6.35032	6.49145	6.47642	6.49994	6.46518	6.42676	6.33984	6.5306	6.40573	6.54723	6.56981	6.59651	6.59899	6.487	6.70228	6.47473	6.5539	6.29653	6.5779	6.64426	6.58975	6.42212	6.55064	6.51537	6.57758	6.53056	6.65435	6.78663	6.73019	6.7335	6.76348	6.64595	6.58997	6.36711	6.51763	6.56821	0.490106
		Ljwgs_065722.1	Ljwgs_065722.1_at	6.37338	6.45011	6.32128	6.42187	6.33633	6.19645	6.34459	6.51317	6.39633	6.41785	6.38349	6.39623	6.56974	6.46108	6.37847	6.38305	6.38964	6.46096	6.42896	6.41758	6.5604	6.38012	6.40667	6.42456	6.40611	6.39629	6.39478	6.37454	6.39674	6.38497	6.3661	6.3776	6.28554	6.37748	6.23243	6.31868	6.39038	6.2345	0.37329
		gi45402903	gi45402903_at	6.3671	6.52936	6.33575	6.5591	6.2496	6.35263	6.35966	6.24093	6.28776	6.56212	6.26567	6.46554	6.42876	6.46309	6.33549	6.24302	6.36227	6.17012	6.58054	6.41237	6.51231	6.43551	6.38714	6.33626	6.40284	6.36285	6.42659	6.35318	6.33178	6.42028	6.46928	6.49059	6.33918	6.39375	6.3492	6.21711	6.20353	6.10613	0.474412
B		Constitutively Expressed Genes Across All Wild Type Conditions (61 Probe Sets/60 ORFs)
				gcRMA expression
		ORF	Probe Set	WT_Rz1d_rootwindow	WT_NF1d_rootwindow	WT_uninoculated_rootwindow	WT_uninoculated_root_tip	WT_Rz1d_root	WT_Rz1d+nodC_root	WT_Rz3d_root	WT_Rz3d_shoot	WT_uninoculated_root	WT_uninoculated_shoot	WT_nitrate3weeks_root	WT_nitrate3weeks_shoot	WT_Rz21d_nodule	WT_Rz21d_root+nodule	WT_Rz14d_nodule	WT_Rz7d_root+nodule	WT_nitrate6weeks_root	WT_nitrate6weeks_leaves	WT_nitrate6weeks_stems	WT_nitrate13weeks_flowers	range
		gi45625132	gi45625132_at	8.16977	8.18515	8.13147	8.17562	8.2015	8.23992	8.17909	8.16485	8.15977	8.19185	8.21172	8.15503	8.21838	8.23278	8.18073	8.18612	8.33398	8.1788	8.19883	8.15579	0.20251
		Ljwgs_056473.2	Ljwgs_056473.2_at	6.79687	6.78551	6.8963	6.84805	6.90152	6.91762	6.97107	6.78855	6.8667	6.95606	6.98113	6.82786	6.77713	6.84911	6.76617	6.75801	6.87456	6.9241	6.79073	6.80832	0.223119
		chr1.CM0029.4	chr1.CM0029.4_at	6.3558	6.41227	6.42826	6.43288	6.45777	6.43778	6.41365	6.51466	6.40596	6.50659	6.43209	6.41728	6.59358	6.43359	6.43396	6.44777	6.4119	6.42179	6.48886	6.45762	0.237776
		Ljwgs_126977.1	Ljwgs_126977.1_at	7.51424	7.50182	7.51918	7.53827	7.53315	7.52976	7.57163	7.51414	7.5296	7.51762	7.55373	7.52552	7.6368	7.57202	7.5219	7.7046	7.53118	7.52211	7.57993	7.46178	0.24283
		Ljwgs_035655.2	Ljwgs_035655.2_at	6.66541	6.54404	6.5341	6.54838	6.55314	6.49636	6.59972	6.45555	6.6068	6.51577	6.54857	6.46102	6.55356	6.46419	6.61209	6.71032	6.515	6.52629	6.66659	6.53186	0.254772
		Ljwgs_042198.1	Ljwgs_042198.1_at	8.56873	8.4647	8.56567	8.61012	8.48364	8.38097	8.42029	8.49502	8.43602	8.41186	8.48075	8.55208	8.66783	8.51338	8.64868	8.54753	8.38356	8.48281	8.55517	8.56391	0.286858
		gi45617188	gi45617188_at	6.52277	6.59004	6.47612	6.72529	6.59592	6.65954	6.55205	6.55967	6.55988	6.57184	6.67876	6.55868	6.55633	6.73426	6.58843	6.58307	6.59114	6.50891	6.44662	6.60571	0.287638
		gi45398003	gi45398003_at	6.11215	6.17854	6.201	6.37908	6.28727	6.16415	6.0892	6.22115	6.13275	6.34618	6.154	6.29301	6.20603	6.24463	6.16939	6.13277	6.20735	6.14646	6.12616	6.18145	0.289883
		gi45348456	gi45348456_x_at	11.791	11.9187	11.8173	11.8287	12.0418	12.0293	11.8188	11.9674	11.9154	11.9715	11.9465	11.9109	11.864	12.0511	11.8373	12.007	12.0991	11.8723	11.8741	11.8726	0.308098
		gi45625048	gi45625048_at	6.47592	6.49845	6.4915	6.52045	6.62244	6.70262	6.54368	6.72811	6.60709	6.79093	6.56757	6.6307	6.53218	6.66062	6.47813	6.73333	6.68268	6.57535	6.64839	6.53978	0.315017
		Ljwgs_020964.1	Ljwgs_020964.1_at	7.36678	7.04222	7.31402	7.39006	7.26876	7.13925	7.13514	7.28743	7.24449	7.35984	7.24144	7.29273	7.32075	7.34769	7.38707	7.34881	7.19249	7.36886	7.3508	7.36741	0.347831
		chr3.CM0216.54	chr3.CM0216.54_s_at	11.7173	11.5108	11.5153	11.6344	11.7085	11.7375	11.8017	11.5626	11.8218	11.5631	11.8517	11.5035	11.5866	11.6624	11.7202	11.7503	11.5021	11.7558	11.5785	11.5145	0.34963
		Ljwgs_032715.2	Ljwgs_032715.2_at	10.4119	10.4887	10.4419	10.5074	10.5151	10.5035	10.4462	10.7653	10.6743	10.6544	10.5302	10.4922	10.4762	10.5263	10.4808	10.5079	10.5051	10.6065	10.4545	10.5573	0.353383
		chr4.CM0343.6	chr4.CM0343.6_at	6.90242	6.88616	6.84624	6.98863	7.04514	6.87811	6.98892	6.86818	6.96986	6.92352	6.97627	6.69576	7.01077	7.05008	6.93555	6.8628	6.93563	6.91981	6.92952	6.8847	0.354327
		gi45355855	gi45355855_at	10.6555	10.8047	10.9669	10.7806	10.8193	10.8724	10.8919	10.8072	10.9118	10.991	10.8969	10.7996	10.7994	10.8766	10.792	10.8512	10.8818	10.6339	10.7753	10.7683	0.357163
		Ljwgs_025946.1	Ljwgs_025946.1_at	12.1329	12.2531	12.0383	12.2997	12.1667	12.1061	12.2565	12.1491	12.1366	12.0711	12.2095	11.9422	11.9471	12.167	12.0831	12.2532	12.1342	12.1677	12.1239	12.084	0.357498
		Ljwgs_101687.1	Ljwgs_101687.1_at	7.88007	7.88263	7.87829	8.1235	8.04087	7.97078	7.98215	8.00445	7.97431	7.90615	7.91073	7.85346	7.92427	8.02118	7.83928	8.00737	7.983	7.76592	7.9133	7.88534	0.357572
		gi45579107	gi45579107_at	9.5817	9.8319	9.64279	9.6857	9.72075	9.7369	9.71913	9.7139	9.68342	9.72444	9.70796	9.55842	9.67456	9.7713	9.69228	9.72849	9.76221	9.46615	9.69971	9.51643	0.36575
		gi45398000	gi45398000_at	7.03464	7.01208	7.23418	7.27957	7.0639	7.09337	7.03143	7.24947	7.13138	7.10935	7.0836	7.22141	6.99102	7.16869	7.0275	7.21055	7.06675	7.00079	6.91148	7.00059	0.368087
		gi45608415	gi45608415_at	7.18341	7.33588	7.1412	7.03174	7.0852	7.11256	6.99065	7.0532	7.15504	7.15683	7.03058	7.03755	7.12811	7.35911	7.11276	7.01977	6.99405	7.00222	7.00557	7.02885	0.368453
		chr2.TM0838.20	chr2.TM0838.20_at	7.17221	7.22484	7.18709	7.35142	7.19607	7.19599	7.31611	7.18029	7.29077	7.18114	7.19917	7.18387	7.10079	7.19852	6.98642	7.35624	7.07967	7.20595	7.18089	7.2176	0.369821
		chr2.TM0660.1	chr2.TM0660.1_at	9.6948	9.70754	9.89454	9.69435	9.83627	9.84616	9.8925	9.63293	9.82348	9.77276	9.81521	9.56512	9.71752	9.76062	9.89933	9.61177	9.8564	9.74923	9.86027	9.52891	0.370423
		chr6.CM0066.18	chr6.CM0066.18_at	9.59862	9.60442	9.51898	9.6957	9.69579	9.68431	9.71091	9.70375	9.73673	9.67936	9.67661	9.44313	9.43116	9.48028	9.48273	9.57124	9.53789	9.36589	9.40682	9.41087	0.370833
		gi45631755	gi45631755_at	6.44699	6.77222	6.6537	6.4888	6.55338	6.63637	6.4667	6.57099	6.77546	6.68551	6.5332	6.47761	6.4696	6.66209	6.49822	6.60124	6.74883	6.40339	6.5044	6.48972	0.372067
		Ljwgs_065722.1	Ljwgs_065722.1_at	6.33633	6.19645	6.38349	6.39623	6.56974	6.46108	6.37847	6.38305	6.5604	6.38012	6.40667	6.42456	6.3661	6.3776	6.28554	6.37748	6.23243	6.31868	6.39038	6.2345	0.37329
		TC12850	TC12850_at	7.64331	7.45567	7.80359	7.64711	7.62671	7.69857	7.57329	7.51826	7.59958	7.50706	7.72771	7.55562	7.58006	7.82546	7.53221	7.51201	7.67391	7.59602	7.65354	7.44851	0.37695
		Ljwgs_126530.1	Ljwgs_126530.1_s_at	7.2294	7.37797	7.09813	7.2873	7.20551	7.28519	7.44609	7.43441	7.21997	7.20055	7.25597	7.24027	7.06666	7.11446	7.18877	7.38484	7.15104	7.12629	7.20787	7.05168	0.394406
		Ljwgs_018207.1	Ljwgs_018207.1_at	6.47642	6.49994	6.40573	6.54723	6.56981	6.59651	6.59899	6.487	6.5779	6.64426	6.58975	6.42212	6.73019	6.7335	6.76348	6.64595	6.58997	6.36711	6.51763	6.56821	0.396372
		gi45403239	gi45403239_at	6.23033	6.32303	6.2108	6.61184	6.27021	6.26816	6.23637	6.35029	6.37289	6.27358	6.29777	6.51474	6.36763	6.3921	6.30769	6.27163	6.34171	6.35318	6.34237	6.2427	0.401039
		gi45402903	gi45402903_at	6.2496	6.35263	6.26567	6.46554	6.42876	6.46309	6.33549	6.24302	6.51231	6.43551	6.38714	6.33626	6.46928	6.49059	6.33918	6.39375	6.3492	6.21711	6.20353	6.10613	0.406179
		TC11088	TC11088_at	7.21634	7.2842	7.4495	7.44825	7.47754	7.40595	7.30103	7.42672	7.48915	7.50078	7.34769	7.29536	7.35026	7.61595	7.51719	7.36937	7.49822	7.19787	7.22822	7.2858	0.418075
		chr2.CM0249.42	chr2.CM0249.42_at	9.06414	9.12628	9.27604	9.02557	9.0795	9.3406	9.23496	9.30273	9.27652	9.37789	9.09964	8.98527	9.20695	9.17145	9.23135	8.95922	9.19399	8.96326	9.04811	9.22431	0.418673
		TC16276	TC16276_at	10.7757	10.7808	10.9474	10.8909	11.0758	11.0224	10.8664	11.0724	11.1249	11.1572	10.9979	10.7585	10.9329	11.162	10.8419	11.0622	11.1781	10.8801	11.1032	10.8146	0.419578
		Ljwgs_013840.1	Ljwgs_013840.1_at	7.4271	7.41116	7.51534	7.77226	7.66119	7.58758	7.54499	7.65295	7.54637	7.67041	7.51785	7.60396	7.62766	7.5525	7.64418	7.7555	7.83209	7.50694	7.72232	7.5305	0.420932
		Ljwgs_050788.1.1	Ljwgs_050788.1.1_at	7.4978	7.17903	7.57607	7.58676	7.44111	7.32473	7.33558	7.60172	7.35655	7.5262	7.34762	7.32403	7.36908	7.57053	7.46982	7.32264	7.51462	7.43099	7.29362	7.25312	0.422696
		gi45399802	gi45399802_at	9.10566	9.3964	9.34478	9.5307	9.52081	9.45468	9.37467	9.27681	9.46806	9.50624	9.51495	9.42708	9.36183	9.52914	9.30207	9.44622	9.51583	9.33394	9.24944	9.34173	0.425032
		gi45413460	gi45413460_at	7.22082	7.17803	7.21186	7.32961	7.35974	7.38015	7.19044	7.47134	7.35577	7.3554	7.34993	7.31561	7.38985	7.6035	7.49394	7.32139	7.39576	7.31998	7.51786	7.28321	0.425464
		gi45641725	gi45641725_at	6.18356	6.48398	6.31273	6.45881	6.33103	6.57913	6.2845	6.36018	6.58133	6.29486	6.38563	6.44155	6.26627	6.53847	6.23186	6.32997	6.46937	6.30026	6.15562	6.3701	0.425707
		chr1.CM0361.32	chr1.CM0361.32_at	8.11032	7.92056	8.18841	8.15851	8.06783	8.01889	8.11724	8.29129	8.23362	8.08803	8.09519	8.0832	8.3237	8.1037	8.16661	8.05487	8.00023	8.04046	7.89275	8.1933	0.430951
		Ljwgs_103615.1	Ljwgs_103615.1_at	9.41621	9.21845	9.40736	9.31434	9.54295	9.52544	9.53973	9.51099	9.51189	9.55807	9.46909	9.40056	9.60386	9.41431	9.47139	9.65179	9.48507	9.39349	9.63202	9.57609	0.433341
		gi45617887	gi45617887_at	7.8767	8.00014	7.96644	7.94726	8.03566	7.86487	7.71067	7.76418	8.01276	7.85238	8.04352	7.85574	7.78936	7.93399	7.86639	7.88625	8.14035	7.81086	7.80674	7.70564	0.434707
		Ljwgs_079423.1.1	Ljwgs_079423.1.1_at	6.79298	6.92467	6.71977	6.59569	6.6979	6.77694	6.81548	6.59402	6.77623	6.71676	6.75301	6.66212	6.9108	6.74242	7.00281	6.71454	6.6975	6.56102	6.76537	6.72966	0.441791
		gi45614358	gi45614358_at	6.66418	6.91153	6.74955	6.70065	6.89193	6.69654	6.49183	6.60876	6.67581	6.6852	6.72058	6.71121	6.91947	6.82188	6.87439	6.76586	6.76793	6.68582	6.47669	6.48093	0.442779
		gi1370204	gi1370204_at	13.1239	13.0834	13.1742	13.3185	13.3596	13.4661	13.3895	13.1862	13.337	13.2344	13.5163	13.1204	13.1845	13.3311	13.1469	13.5032	13.4734	13.0665	13.3313	13.1013	0.449864
		Ljwgs_106570.1	Ljwgs_106570.1_at	6.98626	6.91729	6.998	7.01302	6.98547	6.95624	6.98796	7.12355	6.98202	7.08925	7.0079	7.25074	6.97003	6.9678	6.9936	6.99435	7.01611	7.36801	7.00479	6.98375	0.450721
		chr1.CM0121.20	chr1.CM0121.20_s_at	8.16678	8.17494	8.35177	8.29484	8.39822	8.29928	8.12376	8.48139	8.2567	8.55259	8.41492	8.2702	8.09968	8.36758	8.17067	8.18138	8.45695	8.54089	8.10264	8.54054	0.452904
		chr2.TM0889.17	chr2.TM0889.17_at	6.24653	6.12448	6.20321	6.24351	6.51867	6.24674	6.12025	6.115	6.33647	6.25494	6.28822	6.17348	6.23329	6.51313	6.20408	6.5459	6.53521	6.10452	6.08776	6.16779	0.458142
		TC19348	TC19348_at	7.22717	7.28721	7.33835	7.20799	7.23344	7.30752	7.08603	7.29764	7.30627	7.45286	7.28652	7.43479	7.48665	7.39222	7.43111	7.27276	7.30765	7.54499	7.4154	7.47089	0.458959
		gi45625591	gi45625591_at	7.54927	7.68339	7.79208	7.78057	7.74588	7.76427	7.57397	7.81574	7.82626	7.85997	7.7702	7.75162	7.53731	7.91786	7.60873	7.66856	7.81729	7.45556	7.59302	7.88518	0.462297
		Ljwgs_052213.1	Ljwgs_052213.1_at	6.47856	6.63091	6.54348	6.51275	6.54512	6.53879	6.58218	6.67807	6.52442	6.74491	6.54229	6.53751	6.94458	6.54505	6.88524	6.53068	6.53602	6.52041	6.51571	6.72742	0.466017
		Ljwgs_033558.1	Ljwgs_033558.1_at	7.96423	8.01617	8.00284	7.92365	8.1888	8.18691	8.17305	8.10658	8.09598	8.31686	7.88682	7.88441	8.02662	8.01659	8.12073	7.84411	8.11179	8.09504	7.93324	8.14211	0.472749
		gi45625081	gi45625081_at	10.8298	10.7739	10.9227	10.4391	10.924	10.9138	10.7274	10.6471	10.7381	10.9065	10.7303	10.7657	10.7352	10.8778	10.7734	10.7474	10.8737	10.5924	10.7397	10.6695	0.484936
		Ljwgs_052271.2	Ljwgs_052271.2_s_at	11.2876	11.2246	11.3709	11.1596	11.1894	11.3557	11.2219	10.9254	11.1056	11.2236	11.1807	11.0774	10.9325	11.0931	10.9167	11.1834	11.3661	11.0483	11.4017	11.0119	0.485083
		Ljwgs_055165.1	Ljwgs_055165.1_x_at	7.69027	7.71185	7.72036	8.06857	7.76313	7.81353	8.0352	7.78773	7.6575	7.73748	7.89065	7.66688	7.72301	7.76269	7.6847	7.68478	7.58237	7.66215	7.94324	7.79703	0.486197
		chr2.CM0249.57	chr2.CM0249.57_at	6.1968	6.29696	6.09416	6.34544	6.35575	6.28506	6.4271	6.27263	6.32932	6.33889	6.31683	6.18331	6.43867	6.24269	6.33927	6.2926	6.22435	6.12496	6.17735	6.58039	0.486236
		Ljwgs_075848.1	Ljwgs_075848.1_at	6.80861	6.56843	6.67837	6.60758	6.7382	6.60633	6.80196	6.55427	6.74201	6.51917	6.59316	6.41159	6.5612	6.60737	6.55783	6.57138	6.56978	6.3195	6.44465	6.44568	0.489101
		Ljwgs_022993.1	Ljwgs_022993.1_at	8.21426	8.10852	8.22103	8.59849	8.31939	8.32602	8.41741	8.25872	8.29929	8.28053	8.38428	8.35598	8.31766	8.22792	8.43794	8.38488	8.48546	8.57061	8.38511	8.31376	0.489974
		Ljwgs_126977.1	Ljwgs_126977.1_x_at	7.54272	7.60206	7.56321	7.95922	7.69493	7.64653	7.87839	7.56214	7.70509	7.60011	7.86787	7.62323	7.82619	7.73092	7.73574	7.9532	7.79208	7.59233	7.66667	7.46588	0.493345
		Ljwgs_068427.1	Ljwgs_068427.1_at	10.425	10.4042	10.3539	10.5226	10.8115	10.533	10.7589	10.587	10.7937	10.7109	10.597	10.4514	10.7623	10.4984	10.8488	10.6321	10.6274	10.5542	10.8491	10.716	0.495242
		Ljwgs_005743.2	Ljwgs_005743.2_at	9.27621	9.26149	9.12551	9.59629	9.30299	9.42241	9.48789	9.33515	9.54106	9.09787	9.50629	9.15252	9.41027	9.11203	9.33435	9.34852	9.31832	9.36837	9.37091	9.35424	0.498419
		TM1056.14	TM1056.14_at	8.65459	8.29964	8.42212	8.3499	8.46387	8.44134	8.54651	8.35164	8.44224	8.37388	8.61863	8.155	8.43734	8.25314	8.45055	8.45218	8.47265	8.45093	8.34384	8.30507	0.499584
C		Commonly Used Lotus Housekeeping Genes
				gcRMA expression
	Target Gene		Probe Set	nfr1_Rz1d_rootwindow	nfr5_Rz1d_rootwindow	nin_Rz1d_rootwindow	nup133_Rz1d_rootwindow	WT_Rz1d_rootwindow	WT_NF1d_rootwindow	nfr1_uninoculated_rootwindow	nfr5_uninoculated_rootwindow	nin_uninoculated_rootwindow	nup133_uninoculated_rootwindow	WT_uninoculated_rootwindow	WT_uninoculated_root_tip	WT_Rz1d_root	WT_Rz1d+nodC_root	WT_Rz3d_root	WT_Rz3d_shoot	sym16_Rz3d_root	sym16_Rz3d_shoot	sym16_uninoculated_root	sym16_uninoculated_shoot	WT_uninoculated_root	WT_uninoculated_shoot	WT_nitrate3weeks_root	WT_nitrate3weeks_shoot	sym6_uninoculated	sym11_uninoculated	sym13_uninoculated	sym6_Rz21d	sym11_Rz21d_nodule	sym13_Rz21d_nodule	WT_Rz21d_nodule	WT_Rz21d_root+nodule	WT_Rz14d_nodule	WT_Rz7d_root+nodule	WT_nitrate6weeks_root	WT_nitrate6weeks_leaves	WT_nitrate6weeks_stems	WT_nitrate13weeks_flowers	Range
	Glyceraldehyde-3-phosphate dehydrogenase		TC14070-3_at	14.9712	15.0829	14.9378	15.1215	14.8786	14.8326	15.0392	14.8598	14.9313	15.0661	14.8759	14.9751	15.0768	15.1126	14.9783	14.7091	15.0867	14.6856	15.1	14.7729	15.0084	14.7639	15.1461	14.7212	15.2055	15.0296	15.0978	15.0611	14.9297	14.9343	14.8964	15.0433	14.8936	15.0914	15.0698	14.6299	14.8556	14.7322	0.575628
			TC14070-5_at	14.3074	14.4709	14.3078	14.5664	14.2298	14.1974	13.6319	14.1819	14.0551	14.3004	13.5143	14.505	14.4943	14.2681	14.6894	13.48	14.149	13.7129	13.9808	11.4917	14.2978	13.3992	14.5467	13.6934	14.1789	14.2892	14.6338	14.6746	14.4238	14.5235	14.4668	14.2051	14.4743	14.2897	13.9751	14.1478	14.2996	13.8164	3.19767
	Ubiquitin		TC14054-3_at	14.4145	14.2405	14.337	14.3878	14.3511	14.0277	14.524	14.4101	14.4639	14.2574	14.3565	14.112	14.3615	14.5253	14.2642	14.253	14.576	14.2287	14.4023	14.3896	14.4065	14.3571	14.4576	14.1715	14.5658	14.369	14.3376	14.3195	14.3517	14.2903	14.2527	14.3573	14.2586	14.5014	14.5528	13.9765	14.2201	14.1856	0.599451
			TC14054-5_at	13.984	13.8446	13.9065	13.8881	13.8655	13.607	13.6515	14.0727	13.9007	13.8684	13.4361	13.5644	13.8572	13.9695	13.9284	13.7719	13.4788	13.909	13.5948	11.7303	13.765	13.8536	13.8784	13.6915	13.5757	13.7731	13.8766	13.9861	13.941	13.9282	13.8267	13.6671	13.8117	14.0351	13.7966	13.7817	13.7889	13.672	2.34239
	Tubulin		TC8038-3_at	12.488	12.6589	12.255	12.8184	12.3045	12.3383	12.7365	12.1366	12.4978	12.7569	12.4745	13.1077	12.9916	13.2797	13.1652	12.6479	13.1666	12.3926	13.217	12.6612	13.167	12.6339	13.253	12.7925	13.3928	13.1729	13.2239	13.1937	12.5958	12.4531	12.2545	13.0585	12.1438	13.4536	13.0138	12.2987	12.867	12.5315	1.31705
			TC8038-5_at	6.79803	6.81787	6.66222	6.70066	6.38375	6.64157	6.41543	6.82891	6.64954	6.69409	5.9117	8.19293	7.41795	7.48256	8.04641	6.85353	7.12312	6.55377	6.19924	2.87943	7.28416	6.26509	7.93149	6.996	7.7699	7.52543	7.46574	8.09136	6.30741	6.13538	5.82365	6.57661	5.73839	7.88528	6.81813	7.14904	7.4002	6.49388	5.3135
	Actin		TC14247-3_at	12.0113	12.1306	12.0284	12.4437	12.0381	12.9207	11.7539	11.7254	11.9013	12.3356	11.9334	12.798	12.595	12.6642	12.6115	12.04	12.6365	11.9369	12.7594	12.4881	12.7117	11.9795	12.7785	12.1913	12.7472	12.921	12.914	12.8854	11.8448	11.8712	11.7589	12.4345	11.7679	12.6483	12.4641	12.3187	12.7929	12.0459	1.19562
			TC14247-5_at	6.35487	6.42128	6.45364	6.5677	6.27504	6.91334	6.30854	6.27518	6.26959	6.48984	6.34791	6.8488	6.36329	6.66094	7.22251	6.16963	6.21629	6.14316	6.22848	6.2292	6.58222	5.82296	6.55729	6.28704	6.29909	6.44688	7.14809	7.37625	6.34511	6.35104	6.29398	6.30555	6.34859	6.49889	6.33939	6.63324	6.43218	6.34446	1.5533
	Protein phosphatase 2A		TC13923-3_s_at	7.6694	7.94005	7.64236	7.797	7.45802	7.34189	7.68495	7.82848	7.74541	7.81362	6.90012	7.90507	8.16528	7.78113	8.5154	7.38289	7.24452	7.58665	7.29997	5.33768	7.70654	7.57133	7.7395	7.1885	7.35847	7.78728	7.82801	7.86606	7.84025	7.91098	8.00773	7.35894	8.00967	8.21097	7.43609	7.77452	7.85783	7.38882	3.17772
			TC13923-5_at	3.6258	3.4873	3.56686	3.40107	3.428	3.35126	3.31058	3.5975	3.34704	3.32545	3.37497	3.63619	3.65235	3.37662	4.12742	3.31696	3.205	3.70938	3.19359	3.10906	3.4598	3.13966	3.40383	3.25701	3.25711	3.26087	3.7086	3.89717	3.52599	3.83807	3.81331	3.22975	3.7781	3.73021	3.54746	3.72318	3.40109	3.4591	1.01835
	Please note, that these TC numbers are old ones. They have been split into newer versions since the design of the array. Therefore these probe sets, beeing based on old TCs, are not optimal. 3´probe sets generally show more stable expression.
